# Supplementary material
Source: PubMed Central journal article supplement (PMC7035590)

## SUPPLEMENTARY DATA

### **Supplementary Table 1. Type 1 Diabetes TrialNet Study Group participants**

**Steering Committee:** Carla J. Greenbaum (Benaroya Research Institute), Mark A. Atkinson (University of Florida), David A. Baidal (University of Miami), Manuela Battaglia (San Raffaele University), Dorothy Becker (University of Pittsburgh), Penelope Bingley (University of Bristol), Emanuele Bosi (San Raffaele University), Jane Buckner (Benaroya Research Institute), Mark Clements (The Children's Mercy Hospital), Peter G. Colman (Walter & Eliza Hall Institute of Medical Research), Linda DiMeglio (Indiana University), Carmella Evans-Molina (Indiana University), Stephen E. Gitelman (University of California, San Francisco), Robin Goland (Columbia University), Peter Gottlieb (Barbara Davis Center for Childhood Diabetes), Kevan Herold (Yale University), Mikael Knip (University of Helsinki), Jeffrey P. Krischer (University of South Florida), Ake Lernmark (Skane University Hospital), Wayne Moore (The Children's Mercy Hospital), Antoinette Moran (University of Minnesota), Andrew Muir (Emory Children's Center), Jerry Palmer (University of Washington), Mark Peakman (King's College), Louis Philipson (University of Chicago), Philip Raskin (University of Texas Southwestern), Maria Redondo (Baylor College of Medicine), Henry Rodriguez (University of South Florida Diabetes and Endocrinology Center), William Russell (Vanderbilt Eskind Diabetes Clinic), Desmond A. Schatz (University of Florida), Jay M. Sosenko (University of Miami), Lisa Spain (National Institute of Diabetes and Digestive and Kidney Diseases [NIDDK]), John Wentworth (Walter & Eliza Hall Institute of Medical Research), Diane Wherrett (University of Toronto), Darrell M. Wilson (Stanford University), William Winter (University of Florida), Anette Ziegler (Technical University Munich).

**Past Members:** Mark Anderson (University of California, San Francisco), Peter Antinozzi (Wake Forest University), Richard Insel (Juvenile Diabetes Research Foundation [JDRF]), Thomas Kay (St. Vincent's Institute of Medical Research), Jennifer B. Marks (University of Miami), Alberto Pugliese (University of Miami), Bart Roep (Leiden University Medical Center), Jay S. Skyler (University of Miami), Jorma Toppari (Hospital District of Southwest Finland).

**Executive Committee:** Carla J. Greenbaum (Benaroya Research Institute), Jeffrey P. Krischer (University of South Florida), Ellen Leschek (National Institute of Diabetes and Digestive and Kidney Diseases [NIDDK]), Lisa Spain (National Institute of Diabetes and Digestive and Kidney Diseases [NIDDK]).

**Past Members:** Katarzyna Bourcier (National Institute of Allergy and Infectious Diseases [NIAID]), Richard Insel (Juvenile Diabetes Research Foundation [JDRF]), John Ridge (National Institute of Allergy and Infectious Disease [NIAID]), Jay S. Skyler (University of Miami).

**Chair's Office:** Carla J. Greenbaum (Benaroya Research Institute), Lisa Rafkin (University of Miami), Jay M. Sosenko (University of Miami).

**Past Members:** Jay S. Skyler (University of Miami), Irene Santiago (University of Miami).

**TrialNet Coordinating Center (University of South Florida):** Jeffrey P. Krischer, Brian Bundy, Michael Abbondandolo, Timothy Adams, Ilma Asif, Jenna Bjellquist, Matthew Boonstra, Cristina Burroughs, Mario Cleves, David Cuthbertson, Meagan DeSalvatore, Christopher Eberhard, Steve Fiske, Julie Ford, Jennifer Garmeson, Susan Geyer, Brian Hays, Courtney Henderson, Martha Henry, Kathleen Heyman, Belinda Hsiao, Christina Karges, Beata-Gabriela Koziol, Lindsay Lane, Shu Liu, Jennifer Lloyd, Kristin Maddox, Jamie Malloy, Julie Martin, Cameron McNeill, Margaret Moore, Sarah Muller, Thuy Nguyen, Jodie Nunez, Ryan O'Donnell, Melissa Parker, MJ Pereyra, Amy Roberts, Kelly Sadler, Christine Sullivan, Roy Tamura, Elon Walker-Veras, Megan V. Warnock, Keith Wood, Rebecca Wood, Ping Xu, Vanessa Yanek, Kenneth Young.

**Past Members:** Darlene Amado, Amanda Kinderman, Ashley Leinbach, Jessica Miller, Nichole Reed, Tina Stavros.

## SUPPLEMENTARY DATA

**National Institute of Diabetes and Digestive and Kidney Diseases [NIDDK]:** Ellen Leschek, Lisa Spain.

**Data Safety and Monitoring Board:** Emily Blumberg (University of Pennsylvania), Sean Aas (Georgetown University), Gerald Beck (Cleveland Clinic Foundation), Rose Gubitosi-Klug (Case Western Reserve University), Lori Laffel (Joslin Diabetes Center), Robert Vigersky (Medtronic), Dennis Wallace (Research Triangle Institute).

**Past Members:** David Brillon (Cornell University), Robert Veatch (Georgetown University).

**Infectious Disease Safety Committee:** Brett Loechelt (Children's National Medical Center), Lindsey Baden (Brigham and Women's Hospital), Peter Gottlieb (Barbara Davis Center for Childhood Diabetes), Michael Green (University of Pittsburgh), Ellen Leschek (National Institute of Diabetes and Digestive and Kidney Diseases [NIDDK]), Adriana Weinberg (University of Colorado).

**Laboratory Directors:** Santica Marcovina (University of Washington), Jerry P. Palmer (University of Washington), Jay Tischfield (Rutgers University), Adriana Weinberg (University of Colorado), William Winter (University of Florida), Liping Yu (Barbara Davis Center for Childhood Diabetes).

**TrialNet Clinical Network Hub (Benaroya Research Institute):** Annie Shultz, Emily Batts, Arielle Pagryzinski, Mary Ramey, Meghan Tobin.

**Past Members:** Kristin Fitzpatrick, Randy Guerra, Melita Romasco, Christopher Webb.

### **Active Personnel at Clinical Centers Participating in the TN01 Protocol:**

**Barbara Davis Center for Childhood Diabetes, Aurora, Colorado:** Andrea K. Steck, Jennifer Albery, Brenda Bradfield, Lexie Chesshir, Peter A. Gottlieb, Aaron W. Michels, Marian J. Rewers, Kimber Simmons, Megan VanDyke.

**Baylor College of Medicine, Houston, Texas:** Maria J. Redondo, Massimo Pietropaolo, Susan Pietropaolo, Mustafa Tosur.

**Benaroya Research Institute, Seattle, Washington:** Carla J. Greenbaum, Jane H. Buckner, Wei Hao, Sandra Lord, Marli McCulloch-Olson, Mary Ramey, Elaine Sachter, Jenna Snavelly, Meghan Tobin, Corinna Tordillos, Dana VanBuecken, Nancy Wickstrom.

**The Children's Mercy Hospital, Kansas City, Missouri:** Wayne Moore, Marissa Beidelschies, Darlene Brenson-Hughes, Jennifer Boyd, Joe Cernich, Mark Clements, Jennifer Dolan, Aliza Elrod, Emily Haith, Kelsee Halpin, Jennifer James, Terri Luetjen, Cassandra McClain, Ryan McDonough, Susan Mitchell, Fadi Al Muhaisen, Steve Orlich, Emily Paprocki, Barbara Seufferling, Jill Sexton, Jessica Slover.

**Columbia University, New York, New York:** Robin Goland, Analia Alvarez, Magdalena Bogun, Rachelle Gandica, Sarah Pollak, Kristen Williams.

**Emory Children's Center, Atlanta, Georgia:** Andrew Muir, Amber Antich, Kristina Cossen, Eric Felner, Margaret Jenkins, Leonidas Panagiotakopoulos, Brittney Powell-Lee, Wanda Sanchez.

**The Hospital for Sick Children, Toronto, Ontario:** Diane K. Wherrett, Danyella Dias, Lesley Eisel, Roze Kovalakovska, Bianca Perro, Mary Jo Ricci.

## SUPPLEMENTARY DATA

**Indiana University, Indianapolis, Indiana:** Linda A. DiMeglio, Carmella Evans-Molina, Eric Grubbs, Megan Hildinger, Heba M. Ismail, Megan Legge, America Newnum, Juan Sanchez, Emily K. Sims, Maria Spall, Megan Tebbe, Stephanie Woerner.

**San Raffaele Hospital, Milan, Italy:** Emanuele Bosi, Manuela Battaglia, Eleonora Bianconi, Andrea Bolla, Ricardo Bonfanti, Amelia Caretto, Giulio Frontino, Pauline Grogan, Andrea Laurenzi, Chiara Molinari, Matteo Pastore, Alessandra Petrelli.

**Skane University Hospital, Scania, Sweden:** Åke Lernmark, Linda Ahlkvist, Henrik Borg, Berglind Jónsdóttir, Anastasia Katsarou, Jeanette Åkerström Kördel, Helena Larsson, Markus Lundgren, Ulrika Ulvenhag.

**Stanford University, Stanford, California:** Darrell M. Wilson, Nora Arrizon-Ruiz, Tandy Aye, Laura Bachrach, Trudy Esrey, Laura Nally.

**Technical University Munich, Munich, Germany:** Anette Ziegler, Peter Achenbach, Melanie Bunk, Melanie Herbst, Julia Hirte, Anna Hofelich, Verena Hoffmann, Magdalena Kroetz, Claudia Ramminger, Franziska Reinmüller, Katharina Warncke, Tiziana Welzhofer.

**University of Bristol, Bristol, England:** Chris Anderson, Penelope Bingley, Tracey Hughes, Vicky King, Yuk-Fun Liu, Sam Loud, Beth Thorne, Benjamin Wilson.

**University of California, San Francisco, California:** Stephen E. Gitelman, Fatema Abdulhussein, Mark S. Anderson, Glenna Auerback, Jeanne Buchanan, Hannah Chesser, Ayca Erkin-Cakmak, Christine T. Ferrara, Alyssa Huang, Karen Ko, Janet Lee, Roger Long, Srinath Sanda, Caroline Schulmeister, Sarah Kate Selling, Christine Torok, Rebecca Wesch, Jenise Wong.

**University of Chicago, Chicago, Illinois:** Louis Philipson, Diane Deplewski, Gail Gannon, Siri Greeley, Leon Jones, Harini Kolluri, Michelle Lemelman, Cristy Miles, Mary Miller, Rochelle Naylor, Katie O'Sullivan, Mariko Pusinelli, Susan Tucker, Christine Yu.

**University of Florida, Gainesville, Florida:** Desmond A. Schatz, Annie Abraham, Janey Adams, Anastasia Albanese-O'Neill, Mark A. Atkinson, Brittany Bruggeman, Todd M. Brusko, Michael J. Claire-Salzler, Kristin Dayton, Michael J. Haller, Paul Hiers, Jennifer Hosford, Laura M. Jacobsen, John Marks, Henry Rohrs, Janet Silverstein, Paula Towe, William E. Winter, Chelsea Zimmerman.

**University of Helsinki, Helsinki, Finland:** Mikael Knip, Minna Hirvasniemi, Katriina Koski, Kristiina Luopajarvi, Heli Siljander, Riitta Veijola.

**University of Miami, Miami, Florida:** David A. Baidal, Carlos Blaschke, Della Matheson, Janine Sanchez, Natalia Sanders-Branca, Jay S. Skyler, Jay M. Sosenko.

**University of Minnesota, Minneapolis, Minnesota:** Antoinette M. Moran, Melena D. Bellin, Janice Leschyshyn, Jennifer McVean, Brandon M. Nathan, Brittney Nelson, Beth Pappenfus, Jessica Ruedy, Anne Street, Darcy Weingartner.

**University of Pittsburgh, Pittsburgh, Pennsylvania:** Dorothy J. Becker, Kelli DeLallo, David Groscoat, Mary Beth Klein, Ingrid M. Libman, Karen Riley, Frederico Toledo.

## SUPPLEMENTARY DATA

**University of Texas Southwestern, Dallas, Texas:** Philip Raskin, Lauren Boyles.

**University of South Florida Diabetes and Endocrinology Center, Tampa, Florida:** Henry Rodriguez, Ciara Alverex, Sureka Bollepalli, Jerry Brown, Rachel Brownstein, Allison Castro, Emily Eyth, Max Feldman, Rachel Franks, Danielle Gomez, Lucy Guerra, Crystal Jacovino, Verena Jorgensen, Byron Moran, Hugo Navarte, Asa Oxner, Dorothy Shulman.

**Vanderbilt Eskind Diabetes Clinic, Nashville, Tennessee:** William E. Russell, Faith Brendle, Anne Brown, Brenna Hammel, Jenny Leshko, Daniel J. Moore, Kimberly Rainer, Tyler Smith, James W. Thomas, George Williams, Sarah Wright.

**Walter and Eliza Hall Institute of Medical Research, Parkville, Victoria:** Peter Colman, Marika Bjorasen, Spiros Furlanos, Leonard C. Harrison, Felicity Healy, Leanne Redl, John M. Wentworth.

**Yale University, New Haven, Connecticut:** Kevan C. Herold, Laurie Feldman, Robert Sherwin, William V. Tamborlane, Stuart A. Weinzimer.

SUPPLEMENTARY DATA

**Supplementary Table 2. Baseline BMI percentile summarized and compared by subgroups**

| <b>Groups</b>                      | <b>N</b> | <b>BMI%<br/>median</b> | <b>BMI% IQR</b> | <b>p-value*</b> |
|------------------------------------|----------|------------------------|-----------------|-----------------|
| <b><i>Age at Ab+</i></b>           |          |                        |                 |                 |
| <9 years                           | 315      | 58.1                   | 83.8 – 32.3     | 0.12            |
| 9+ years                           | 391      | 65.2                   | 86.2 – 39.3     |                 |
| <b><i>Age at Ab+</i></b>           |          |                        |                 |                 |
| <12 years                          | 461      | 58.0                   | 84.0 – 32.4     | 0.03            |
| 12+ years                          | 245      | 68.2                   | 86.6 – 45.0     |                 |
| <b><i>Sex</i></b>                  |          |                        |                 |                 |
| Female                             | 359      | 64.6                   | 86.1 – 37.8     | 0.31            |
| Male                               | 347      | 60.6                   | 83.0 – 33.7     |                 |
| <b><i>Race/Ethnicity group</i></b> |          |                        |                 |                 |
| NHW                                | 512      | 58.9                   | 82.3 – 34.3     | 0.0004          |
| Non-Hisp. non-                     | 76       | 62.2                   | 85.2 – 37.0     |                 |
| White                              | 118      | 75.8                   | 95.6 – 44.8     |                 |
| Hispanic                           |          |                        |                 |                 |
| <b><i>Ab type</i></b>              |          |                        |                 |                 |
| GADA+                              | 460      | 60.0                   | 84.4 – 31.2     | 0.087           |
| mIAA+                              | 213      | 65.5                   | 83.7 – 41.6     |                 |
| IA-2A+                             | 33       | 70.2                   | 86.6 – 54.2     |                 |

\*Wilcoxon rank sum test comparing continuous BMI% as a measure between two groups, or Kruskal-Wallis test between more than two groups. Abbreviations: Ab+: Autoantibody positivity; NHW: Non-Hispanic White; Hisp: Hispanic

SUPPLEMENTARY DATA

**Supplementary Table 3.**

**A. ceBMI increased risk of progression to multiple autoantibody positivity in children  $\geq 9$  years old.**

| Age            | ceBMI    | n   | HR (95% CI)        | p value |
|----------------|----------|-----|--------------------|---------|
| <9 years       | <0       | 228 | Ref                | 0.40    |
|                | $\geq 0$ | 87  | 0.81 (0.50 – 1.32) |         |
| $\geq 9$ years | <0       | 289 | Ref                | 0.018   |
|                | $\geq 0$ | 102 | 1.92 (1.12 – 3.29) |         |

**B. ceBMI did not increase risk of progression to multiple autoantibody positivity in the overall group regardless of the presence or absence of high risk HLA types.**

| HLA haplotype                                   | ceBMI    | n   | HR (95% CI)        | p value |
|-------------------------------------------------|----------|-----|--------------------|---------|
| Neither DR3 nor DR4-DQ8<br>(i.e. DR3- and DR4-) | <0       | 151 | Ref                | 0.31    |
|                                                 | $\geq 0$ | 54  | 1.51 (0.68 – 3.34) |         |
| DR3 and/or DR4-DQ8                              | <0       | 364 | Ref                | 0.46    |
|                                                 | $\geq 0$ | 135 | 1.16 (0.78 – 1.74) |         |

SUPPLEMENTARY DATA

Supplementary Figure 1. Consort diagram for subjects with single Ab+ included in the analysis

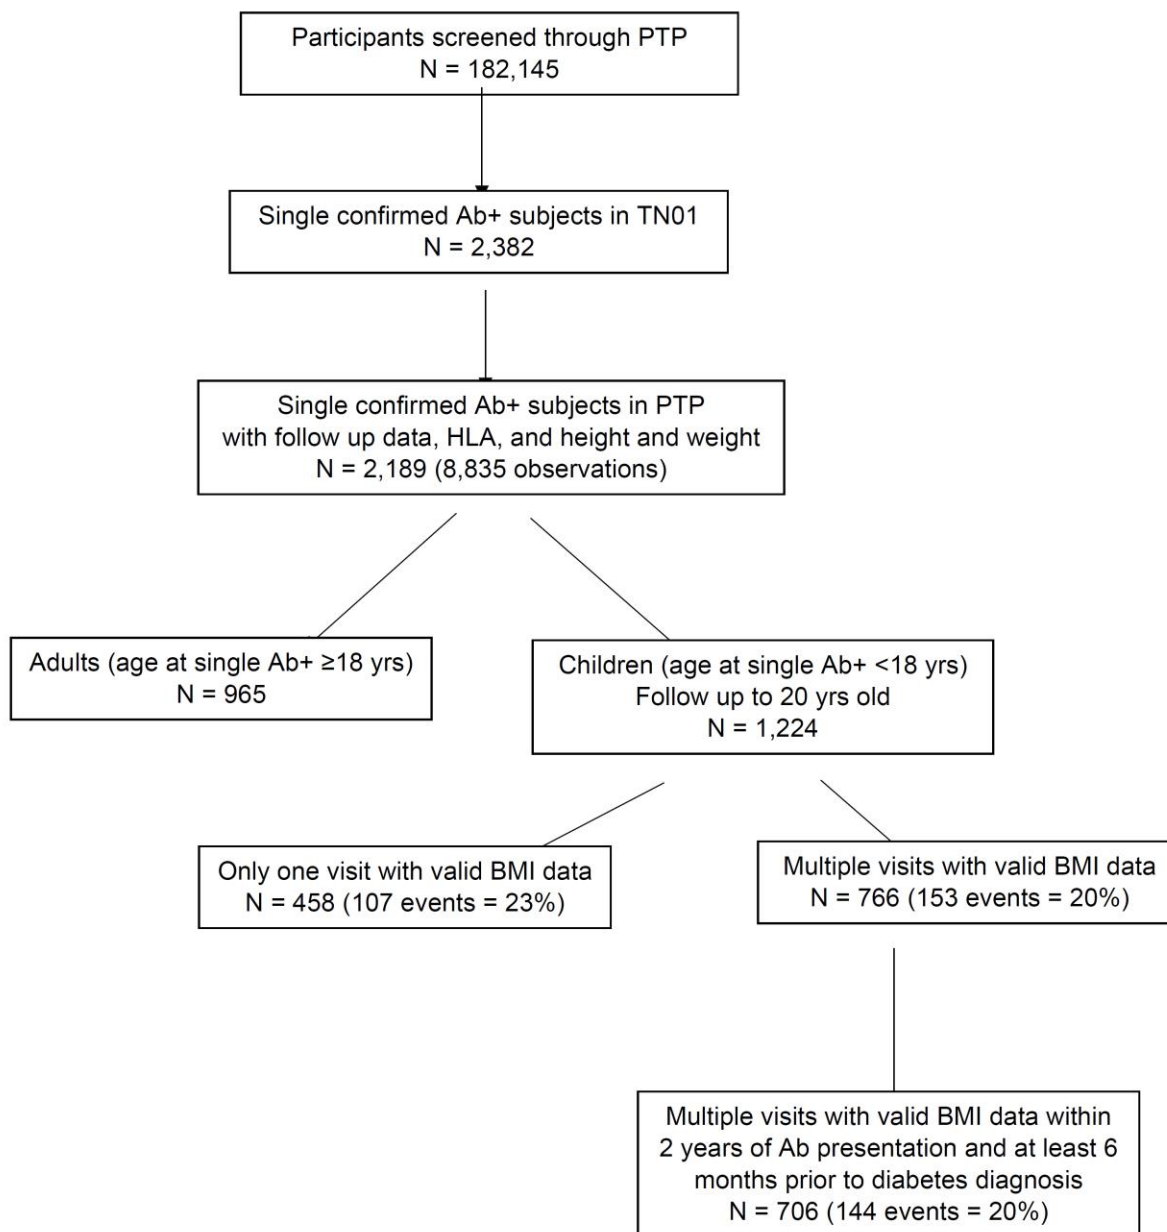

Supplement: DC191167SupplementaryData.pdf [file DC191167SupplementaryData.pdf]
